# Supplementary material
Source: publisher site journal article supplement (https://www.dovepress.com/get_supplementary_file.php?f=445248.docx)

**Supplemental Table 1**. Associations between SIRT3 expression level and baseline clinical characteristics in TBNC

| Clinical Characteristics | SIRT3-Low (n=64) | SIRT3-High (n=62) | p-value |
| --- | --- | --- | --- |
| Age at diagnosis |  |  | 1.0 |
| ≥50 | 40 (62.5%) | 39 (62.9%) |  |
| <50 | 24 (37.5%) | 23 (37.1%) |  |
| Median | 53.0 | 53.5 |  |
| IQR | 45-59 | 48-62 |  |
| RACE |  |  | 0.52 |
| Black | 15 (23.4%) | 19 (30.6%) |  |
| Asia | 5 (7.8%) | 3 (4.8%) |  |
| White | 39 (60.1%) | 38 (61.3%) |  |
| Other | 5 (7.8%) | 2 (3.2%) |  |
| AJCC T-category |  |  | 0.13 |
| T1 | 13 (20.3%) | 17 (27.4%) |  |
| T2 | 45 (70.3%) | 32 (51.6%) |  |
| T3 | 5 (7.8%) | 9 (14.5%) |  |
| T4 | 1 (1.6%) | 4 (6.4%) |  |
| AJCC N-category |  |  | 1.0 |
| N- | 39 (60.9%) | 38 (61.3%) |  |
| N+ | 25 (39.1%) | 24 (38.7%) |  |
| AJCC M-category |  |  | 0.21 |
| M- | 59 (100%) | 48 (96.0%) |  |
| M+ | 0 (0%) | 2 (4.0%) |  |
| Stage at diagnosis |  |  | 0.14 |
| I | 7 (11.3%) | 14 (23.3%) |  |
| II | 44 (71.0%) | 35 (58.3%) |  |
| III | 11 (17.7%) | 9 (15.0%) |  |
| IV | 0 (0.0%) | 2 (3.3%) |  |

AJCC: The American Joint Committee on Cancer

**Supplemental Figure 1**. The Kaplan–Meier curves of SIRT1-7 for TCGA-BRCA cohort


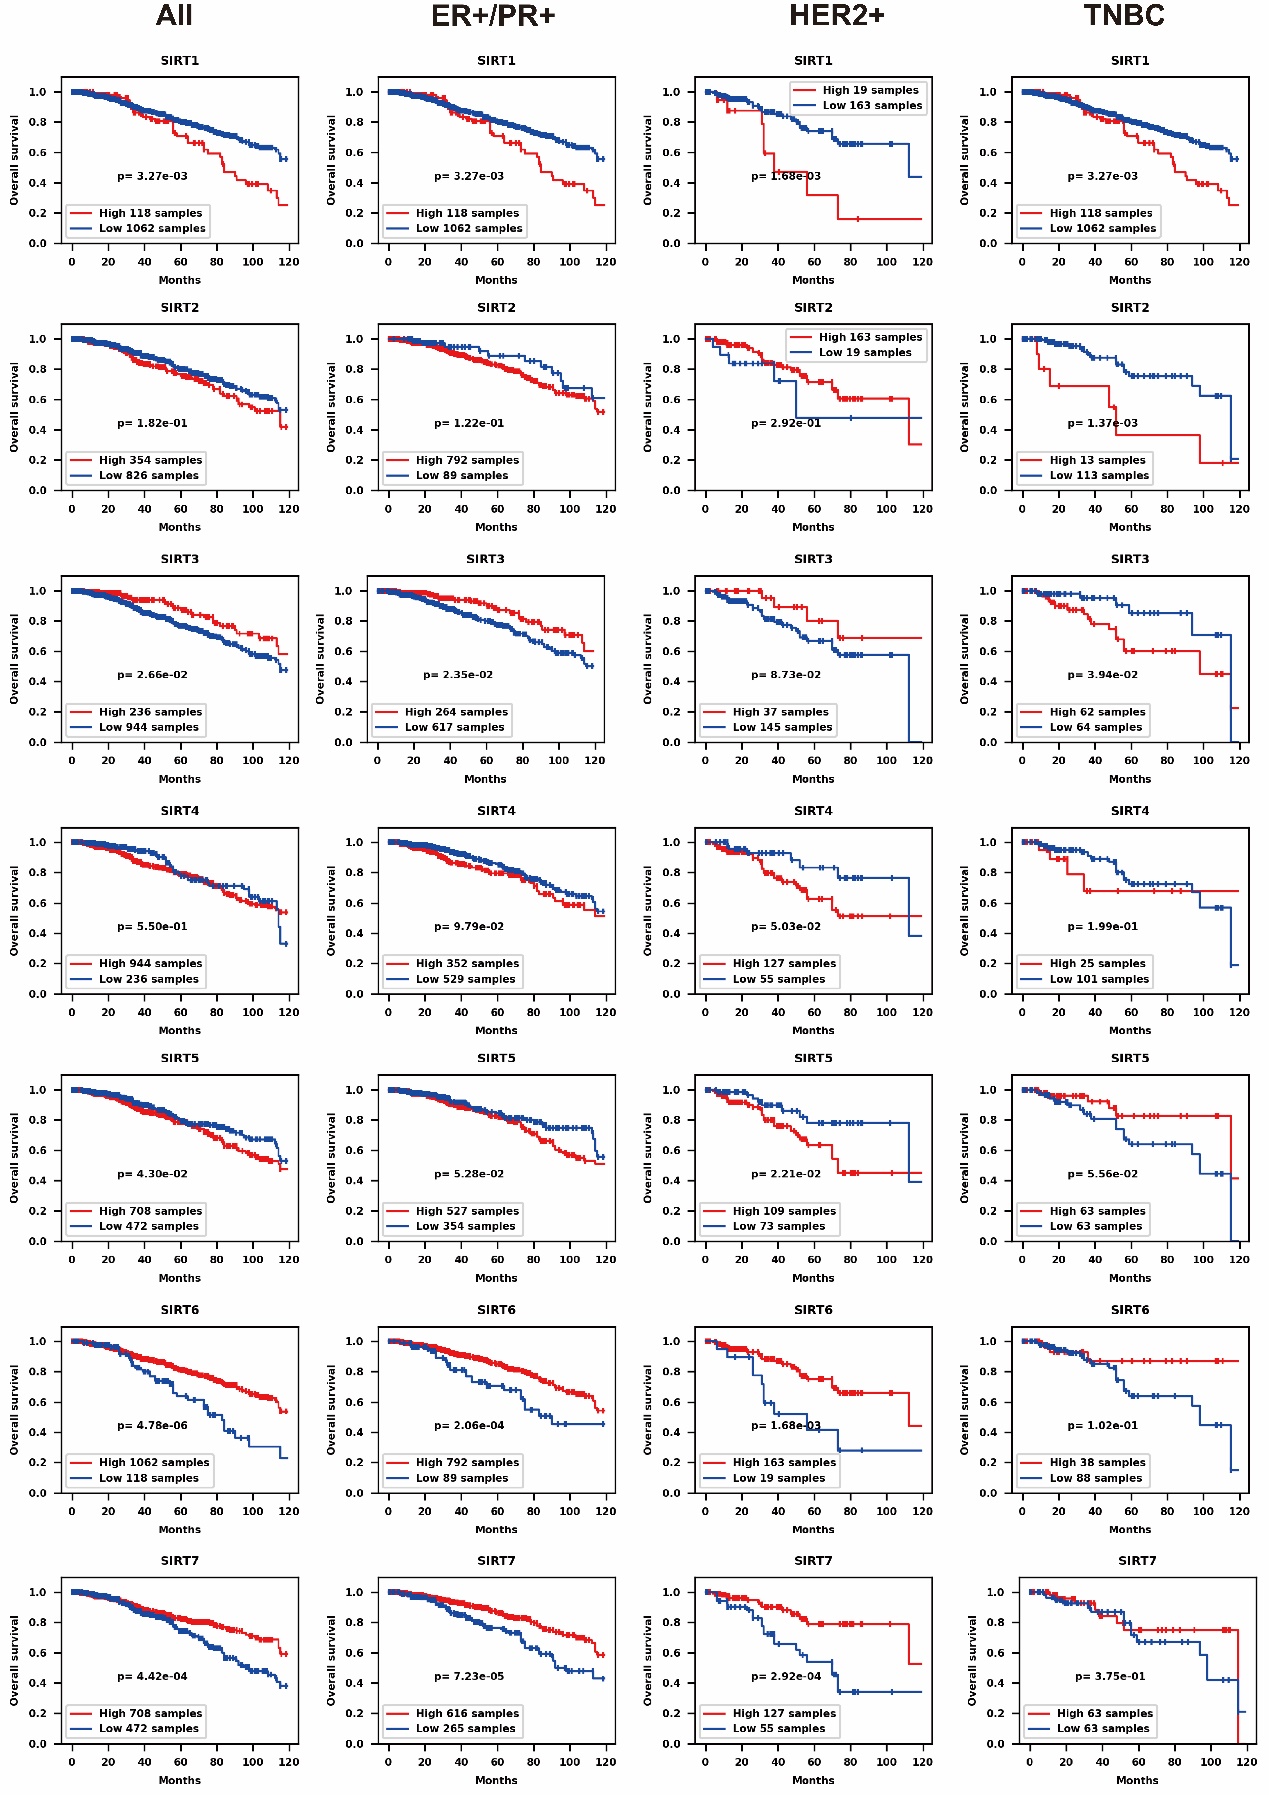


**Supplemental Figure 2**. The Kaplan–Meier curves of SIRT1-7 for METABRIC cohort


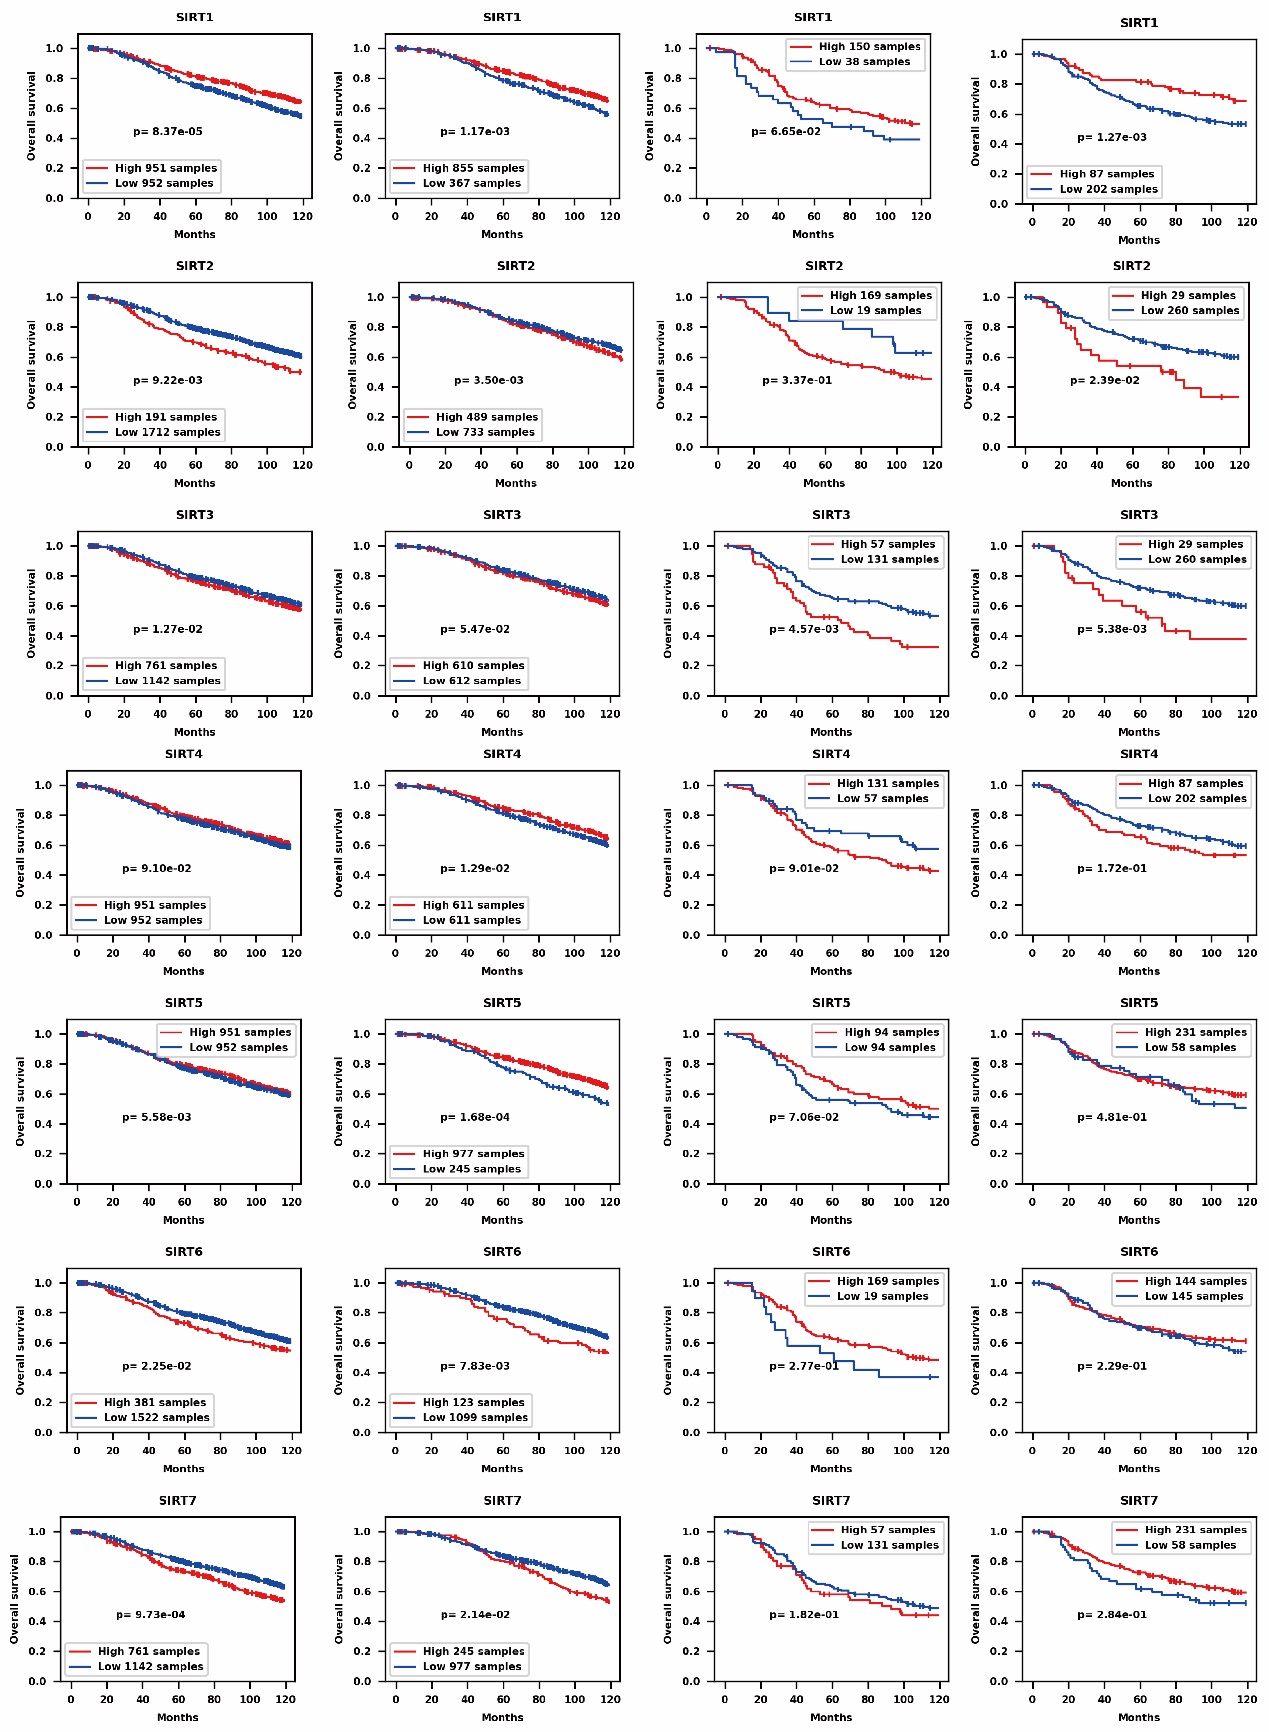

Supplement: Supplementary file 1 [file get_supplementary_file.php]
